# Supplementary material for: A New High-Throughput Tool to Screen Mosquito-Borne Viruses in Zika Virus Endemic/Epidemic Areas
Source: PubMed Central journal article supplement (PMC6832350; doi:10.3390/v11100904), 2019-09-27
Supplement: viruses-11-00904-s001.pdf [file viruses-11-00904-s001.pdf]

**Table S1. List of mosquito-borne viruses, targets, primers/probe sets, and positive controls.**

| Family       | Genus                                 | Species    | Primers/probe         | Sequence (5'-3')                        | Target                      | Length (bp) | Positive controls                        |                          |
|--------------|---------------------------------------|------------|-----------------------|-----------------------------------------|-----------------------------|-------------|------------------------------------------|--------------------------|
| Flaviviridae | Flavivirus                            | Banza      | Banza F               | TCT GTG CCA AAC CAG CTT AG              | NS3                         | 71          | Cell culture strain SA H 336             |                          |
|              |                                       |            | Banza R               | CTC GGA TCT CAG GAG GAT TG              |                             |             |                                          |                          |
|              |                                       |            | Banza P               | TGA GAA GCT GGT TCA GTC CAT TGA CAC ACT |                             |             |                                          |                          |
|              |                                       | Bussuquara | BussuqV F             | GAA GGT CTT GGA GAT GGT GG              | NS5                         | 72          | Cell culture strain BeAn 4073            |                          |
|              |                                       |            | BussuqV R             | GTCTGTACGGGCACAACACT                    |                             |             |                                          |                          |
|              |                                       |            | BussuqV P             | AGC CGT GGC TTA AGA ACA AAC CTG AAT TCT |                             |             |                                          |                          |
|              |                                       | Dengue     | Deng 1 F              | AAC CCA TGG AAG CTG TAC GC              | 3' UTR                      | 120         | Cell culture strain Indonesia and Guiana |                          |
|              |                                       |            | Deng 1 R              | CTA GTC CTT ACC ACC AGG GT              |                             |             |                                          |                          |
|              |                                       |            | Deng 1 P              | ACA GCT TCC CCT GGT GTT GGG CC          |                             |             |                                          |                          |
|              |                                       |            | Deng 2 F              | AGA AGA GAA GAG GAA GAG GCA             | NS5                         | 138         | Cell culture strain D2                   |                          |
|              |                                       |            | Deng 2 R              | TGG CCT GAC TTC TTT TAA CGT C           |                             |             |                                          |                          |
|              |                                       |            | Deng 2 P              | CTT GGA CGG GGC TCA CAG GTA GC          |                             |             |                                          |                          |
|              |                                       |            | Deng 3 F              | GAA GAG ATT CAG GAA GGA GGA             | NS5                         | 144         | Cell culture strain D3                   |                          |
|              |                                       |            | Deng 3 R              | GGC CTG ACT TCT TCT TTT AAC G           |                             |             |                                          |                          |
|              |                                       |            | Deng 3 P              | TCC TTG GAC GGG GCT CAC AGG C           |                             |             |                                          |                          |
|              |                                       |            | Deng 4 F              | TGG ATT CAG GAA GGA GAT AGG             | C                           | 124         | Cell culture strain D4                   |                          |
|              |                                       |            | Deng 4 R              | GTT CGC CAT CTC TTG TTG ACA             |                             |             |                                          |                          |
|              |                                       |            | Deng 4 P              | CCG CAT GCT GAA CAT CTT GAA CGG GA      |                             |             |                                          |                          |
|              |                                       |            | Japanese Encephalitis | JEV F                                   | GCT TAG CGC TCA CAT CCA CT  | NS2a/Ns2b   | 88                                       | Cell culture strain SA14 |
|              |                                       |            |                       | JEV R                                   | CAC CCT CTC TTC TTG TTT GGG |             |                                          |                          |
|              |                                       | JEV P      |                       | TGC AGA CCA TTA GTC CGG CAG CTA TAG T   |                             |             |                                          |                          |
|              |                                       | JEV IIIa F |                       | TGG ACG TCC GCA TGA TCA AC              | E                           | 162         |                                          |                          |
|              |                                       | JEV IIIa R |                       | CCT TGT TTG CAC ACA TAG CTA C           |                             |             |                                          |                          |
|              |                                       | JEV IIIa P |                       | TAT CAG CTC GCT TCT CGT TGT GGG CTT     |                             |             |                                          |                          |
|              |                                       | JEV IIIb F |                       | ACT GAC ATC TCG ACG GTG G               | E                           | 131         |                                          |                          |
|              |                                       | JEV IIIb R |                       | CAT GTG TCA ATG CTT CCC TTC             |                             |             |                                          |                          |
|              |                                       | JEV IIIb P |                       | CTC GGT GCC CCA CGA CTG GAG AA          |                             |             |                                          |                          |
|              |                                       | JEV II F   |                       | GAA GGA GCT AGT GGA GCT AC              | E                           | 156         |                                          |                          |
|              |                                       | JEV II R   |                       | TGA AGC GTG ATA GCA GTA GCT             |                             |             |                                          |                          |
|              |                                       | JEV II P   |                       | TTG GGT GGA CCT GGT GTT AGA AGG AGA TA  |                             |             |                                          |                          |
| JEV I F      | GTT ACT GCT ATC ACG CTT CAG           | E          |                       | 163                                     |                             |             |                                          |                          |
| JEV I R      | GTC AAT GCT TCC TTT CCC GAA           |            |                       |                                         |                             |             |                                          |                          |
| JEV I P      | TCA CTG ACA TTT CAA CGG TGG CTC GAT G |            |                       |                                         |                             |             |                                          |                          |
| JEV IV F     | TTG AAA GGT GCC CAA AGA TTG G         | E          | 188                   |                                         |                             |             |                                          |                          |
| JEV IV R     | TAT TCC CAT CCA GAG TAG CAG A         |            |                       |                                         |                             |             |                                          |                          |
| JEV IV P     | CAG CGT TGG GAG ATA CAG CTT GGG ATT   |            |                       |                                         |                             |             |                                          |                          |
| JEV V F      | GGA TGG ATG CTT GGC AGC AA            | prM/E      | 170                   |                                         |                             |             |                                          |                          |
| JEV V R      | GAG GCA ACT GTC TCC TTC CA            |            |                       |                                         |                             |             |                                          |                          |
| JEV V P      | CAA CGG CCA GCG TGT GGT GTT CAC       |            |                       |                                         |                             |             |                                          |                          |

|                       |                                        |                                           |           |     |                              |
|-----------------------|----------------------------------------|-------------------------------------------|-----------|-----|------------------------------|
| Ilheus                | IlheusV_F                              | GGA AGT GCC ATT TTG CTC CC                | NS5       | 77  | Cell culture strain PE 20545 |
|                       | IlheusV_R                              | AGC GGC ATG GAA CTA CGA TG                |           |     |                              |
|                       | IlheusV_P                              | TAC GTC CAT CCT TCA TCA ACA GCT CGT TG    |           |     |                              |
| Kedougou              | KedV_F                                 | AAG CAC CAA CGG CAG AAG TG                | E         | 85  | Cell culture strain Dak Ar   |
|                       | KedV_R                                 | TGG CTG AAG TCC AAG CCT G                 |           |     |                              |
|                       | KedV_P                                 | ATT GAG CCT CGC ACG TCAT GGT CAT AGT      |           |     |                              |
| Kokobera virus groupe | Kok_I_F                                | CAT CAA GGT ACC AGT GAA CGT               | NS5       | 144 | Cell culture strain MRM      |
|                       | Kok_I_R                                | AAC TCC TCG GAA CTC AAC TCT               |           |     |                              |
|                       | Kok_I_P                                | CTT CTC ACT CTC ATA CCT CTT CTG TGT TCC   |           |     |                              |
|                       | Kok_II_F                               | GTT GTG ATA GTC AGG CCT GAA               | 3'NCR     | 86  |                              |
|                       | Kok_II_R                               | CCA CGA CAC TGG AGC ATC A                 |           |     |                              |
|                       | Kok_II_P                               | CTC CAG GCC GGA TGC AGG CAG               |           |     |                              |
|                       | Kok_Bai_F                              | ACA GAA GAG GTA TGA GAG TGA G             | NS5/3'NCR | 109 |                              |
|                       | Kok_Bai_R                              | TCA GGT GGC TTT TCA GGC CT                |           |     |                              |
|                       | Kok_Bai_P                              | AAG AGA GTT GAG TTC CGA GGA GTT CTG TAG   |           |     |                              |
|                       | Kok_Tor_F                              | TGC GGA TCT CTC ATC GGC TA                | NS5/3'NCR | 183 |                              |
|                       | Kok_Tor_R                              | TCA CCA TCA TTC CCT CTT ACA G             |           |     |                              |
|                       | Kok_Tor_P                              | AAC CCC TGT GAA CTT GAC ACT TTC CTC C     |           |     |                              |
|                       | Kok_Map_F                              | AAG AGA AGA TCT ATG GTG TGG C             | NS5       | 81  |                              |
|                       | Kok_Map_R                              | CTC CAC AGT TCT TCG GAT GTT               |           |     |                              |
|                       | Kok_Map_P                              | TCG CTC ATT GGA CAC AGG CCC AGA A         |           |     |                              |
| Kok_Strat_F           | AAG GCA GAA GGC CGC ATC AT             | E                                         | 177       |     |                              |
| Kok_Strat_R           | AGT CTC CCA AGT CTG CCG T              |                                           |           |     |                              |
| Kok_Strat_P           | CCA GAA GGA GAA TTT GGA GTA CAC AGT GC |                                           |           |     |                              |
| Koutango              | Kout_I_F                               | GAG ATT CCT CGA GGG AGA G                 | NS5       | 200 | Cell culture strain DAK AR D |
|                       | Kout_I_R                               | ACA AGT TGC ACG GCC AGG TT                |           |     |                              |
|                       | Kout_I_P                               | CAC CGC TTA CTA GCC CGA GCA ATC ATT       |           |     |                              |
|                       | Kout_II_F                              | CAG AGC ATC AGG TAA CAT CGT               | NS5       | 190 |                              |
|                       | Kout_II_R                              | TGA GCC TCT CGA TTC TCC TC                |           |     |                              |
| Kout_II_P             | CCA CGC TGT GAG CAT GAC CAG TCA A      |                                           |           |     |                              |
| Murray Encephalitis   | EnM_gI_F                               | TTA CCT ACA CTG ATC TAG TGC G             | NS1/NS2a  | 176 | Cell culture strain 3329     |
|                       | EnM_gI_R                               | CCA GGA CGA GAT TCT CTT GAT T             |           |     |                              |
|                       | EnM_gI_P                               | AGT CCA TCT ACT GCG TGT CAA GCT GG        |           |     |                              |
|                       | EnM_gII_F                              | ATG TGC GAT GAC ACC ATC ACT T             | prM       | 117 |                              |
|                       | EnM_gII_R                              | TCG TGC ATC TTC CAT AGT TCA C             |           |     |                              |
|                       | EnM_gII_P                              | ACG AAT GTC CGA AAT TGG AAA GTG GAA ACG A |           |     |                              |
|                       | EnM_gIII_F                             | ACG ATG AGT CCA CTC TGG TAA               | NS1       | 114 |                              |
|                       | EnM_gIII_R                             | TTC CTC AAG ACC TCC TGG GT                |           |     |                              |
|                       | EnM_gIII_P                             | AG TCA AGG GTC CAA GCA TTC AAT GGA GAC A  |           |     |                              |
|                       | EnM_gIV_F                              | TTG CGA GCA GTA CAC TCA AAC T             | E         | 95  |                              |
|                       | EnM_gIV_R                              | TGC ACA TCC CAT AAG TAG TTC C             |           |     |                              |
| EnM_gIV_P             | CAC CTC AGG CCA TCT CAA GTG CCG        |                                           |           |     |                              |
| EnM_gV_F              | GGA AGA ATG GTG ACG GCT AAT            | E                                         | 127       |     |                              |

|                          |                                       |                                           |       |     |                                                |
|--------------------------|---------------------------------------|-------------------------------------------|-------|-----|------------------------------------------------|
|                          | EnM_gV_R                              | TGA TTG ATC TGC TTG TCT CCC               |       |     |                                                |
|                          | EnM_gV_P                              | CTG CCT ACC ACG ATG TAT GAG TCT CC        |       |     |                                                |
| Rocio                    | RocioV_F                              | GAA AGG AAG CCT GCA GAC CT                | E     | 72  | Cell culture strain 5P H34 675                 |
|                          | RocioV_R                              | TCA CGC TGG ATG GTC ATT CC                |       |     |                                                |
|                          | RocioV_P                              | ATA GCT TTC TGC GTG CAT CCA AAT TTA ACG C |       |     |                                                |
|                          | StLouisEV_F                           | TGCTGATGTTGATTGCCCCG                      |       |     |                                                |
| Saint Louis Encephalitis | StLouisEV-R                           | GTGACACAGCTTCCTCCTC                       | prM   | 125 | Cell culture strain MSI-7                      |
|                          | StLouisEV-P                           | AGTACCAAGTCAATCCATGTTGCCCCG               |       |     |                                                |
|                          | Spond_I_F                             | CTG GTT AAG CAG AGA GAA CTC               |       |     |                                                |
| Spondweni                | Spond_I_R                             | TTC TAG GTC GCA TTT CGT GAT G             | NS5   | 156 | Cell culture strain SM-6 V-1s                  |
|                          | Spond_I_P                             | TGG AGG GGG AGT TGA GGG CTT GG            |       |     |                                                |
|                          | Spond_II_F                            | AGG AGT GTG AAT GCC ACC AG                |       |     |                                                |
|                          | Spond_II_R                            | TGC CAA GTG GAT CCA TAT TCC T             | NS5   | 190 |                                                |
|                          | Spond_II_P                            | CCA GCT GCT CAT GCA CAG AAT GGA CAT       |       |     |                                                |
|                          | UV_F                                  | CAC GCA ACA TGG GAA AAA CC                |       |     |                                                |
| Usutu                    | UV_R                                  | GCA TCC AGT TTG GGG CAT TC                | prM   | 96  | Cell culture strain SAAR-1776                  |
|                          | UV_P                                  | TGC TGG ATT AGA GCC ATG GAT GTC GGG TA    |       |     |                                                |
|                          | WessV-F                               | GTG TCT CCT GGA AAT GGA TGG               |       |     |                                                |
| Wesselsbron              | WessV-R                               | CAT CAA CAG CCA CAT TTG CG                | NS5   | 79  | Cell culture strain SAH-177                    |
|                          | WessV_P                               | ATG ATC AGA GAA ACG GCC TGC CTC AGT       |       |     |                                                |
|                          | WN_F                                  | AAG TTG AGT AGA CGG TGC TGC               |       |     |                                                |
| West Nile                | WN_R                                  | AGA CGG TTC TGA GGG CTT AC                | 3'NTR | 92  | Cell culture strains UG956 D117 + IS98 + MRM16 |
|                          | WN_P                                  | CGA CTC AAC CCC AGG AGG ACT GG            |       |     |                                                |
|                          | WN_1A_F                               | GTT GGC TCT CTT GGC GTT CT                |       |     |                                                |
|                          | WN_1A_R                               | GCA ATT CCG GTC TTT CCT CC                | C     | 194 | Cell culture strain IS98                       |
|                          | WN_1A_P                               | TCA GGT TCA CAG CAA TTG CTC CGA CC        |       |     |                                                |
|                          | WN_1B_F                               | GAA GTT AGC AGT CTA CGT TAG G             |       |     |                                                |
|                          | WN_1B_P                               | TAT GGA AGA TGC ACC AAG ACA CGA CAC TC    | prM   | 194 | Cell culture strain Kunjin MRM16               |
|                          | WN_1B_R                               | GCA TAT CCA GGG TTT CTC AAG               |       |     |                                                |
|                          | WN_1C_F                               | TCA TGG TTG CGA CGT TCG TG                |       |     |                                                |
|                          | WN_1C_P                               | AAG GCT AGG TGG ACG AAC CAG GAG AA        | NS2a  | 188 | NA                                             |
|                          | WN_1C_R                               | AAG TGT TGG TAA ACG TGA TGG C             |       |     |                                                |
|                          | WN_3_F                                | ATT TGA AGA ACC ACA TGC CAC G             |       |     |                                                |
|                          | WN_3_P                                | AAG CAA TCG GTG GTC GCC TTA GGT TCT       | E     | 195 | Cell culture strain Rabensburg                 |
|                          | WN_3_R                                | TGC GCA TAC TCC ATA GGT CG                |       |     |                                                |
|                          | WN_4_F                                | GAT TGT GAA CCC AGG TCA GG                |       |     |                                                |
|                          | WN_4_P                                | CGT TGA TGT GGA CGC CTT CTA CGT GAT       | E     | 137 | NA                                             |
|                          | WN_4_R                                | TGT TCC TCC AGT TCG TGT TTC               |       |     |                                                |
|                          | WN_2.1_F                              | GAG CTG TTT CTT AGC ACG AAG               |       |     |                                                |
|                          | WN_2.1_P                              | ATC TCG ATG TCT AAG AAA CCA GGA GGG C     | C     | 137 | Cell culture strain UG956 D117                 |
|                          | WN_2.1_R                              | CAG ACT CAG CAT AGC CCT CT                |       |     |                                                |
| WN_2.2_F                 | CAT GGA GAA AGT ACA CTG GCT A         |                                           |       |     |                                                |
| WN_2.2_P                 | ATA AGA AAG GAG CTT GGC TGG ACA GCA C | prM                                       | 183   |     |                                                |

|               |             |                   |                                           |                             |        |                           |                           |
|---------------|-------------|-------------------|-------------------------------------------|-----------------------------|--------|---------------------------|---------------------------|
|               |             | WN 2.2 R          | GCA GTA GGA TAG CGA ACA CG                |                             |        |                           |                           |
|               |             | YF F              | CTG TCC CAA TCT CAG TCC AAG               |                             |        |                           |                           |
|               |             | YF R              | AAC GTT TTC CAC CCC ATA GC                | prM                         | 69     |                           |                           |
|               |             | YF P              | AGA GGA GCC AGA TGA CAT TGA TTG CTG GT    |                             |        |                           |                           |
|               |             | FJ AO 4 F         | TGA TGA AGT GCT GAT TGA GGT G             |                             |        |                           |                           |
|               |             | FJ AO 4 R         | TCC GCG CCT TTC ATG GTC T                 | E                           | 142    |                           |                           |
|               |             | FJ AO 4 P         | AAC CCA CCC TTT GGA GAT AGC TAC ATC AT    |                             |        |                           |                           |
|               |             | FJ AO 3 6 F       | AGA CCC GGC AAG AAA AAT GGA               |                             |        |                           |                           |
|               |             | FJ AO 3 6 R       | AGC CAA GAC CAG TAG GGC AA                | M                           | 169    |                           |                           |
|               |             | FJ AO 3 6 P       | TGA CTG GAA GAA TGG GTG AAA GGC AAC TC    |                             |        |                           |                           |
|               |             | FJ AO 1 F         | CCA TGA GCT TGT TTG AGG TTG A             |                             |        |                           |                           |
| Yellow fever  |             | FJ AO 1 R         | GCA TTC CAG AGT AGC TTT TCC A             | E                           | 185    | Cell culture strain 17D   |                           |
|               |             | FJ AO 1 P         | CCA GAC AAA GAT CCA GTA CGT CAT CAG AG    |                             |        |                           |                           |
|               |             | FJ AC AE F        | TGG TCG AAA AGC TCA GGG TAA               |                             |        |                           |                           |
|               |             | FJ AC AE R        | GAA GGG CCA GGT CTG TTT C                 | C                           | 116    |                           |                           |
|               |             | FJ AC AE P        | AAC CCT GGG CGT CAA TAT GGT AAG ACG       |                             |        |                           |                           |
|               |             | FJ AmS 2 F        | CAC ATT CCA GGA TAC AAG GTC               |                             |        |                           |                           |
|               |             | FJ AmS 2 R        | AAT GAT CTT CCC ACT GTC GGT               | NS1                         | 158    |                           |                           |
|               |             | FJ AmS 2 P        | CAG ACA AAT GGG CCT TGG ATG CAG GT        |                             |        |                           |                           |
|               |             | FJ AmS 1 F        | AGC TGA GAT GGG AGC CAA TC                |                             |        |                           |                           |
|               |             | FJ AmS 1 R        | TCT CTG TTA GGG TTC CTT CCA A             | NS3                         | 170    |                           |                           |
|               |             | FJ AmS 1 P        | TCT GCG TGG AGA GAG TGT TGG ATT GTA G     |                             |        |                           |                           |
|               |             | Zika2 F           | AAT GAC ACA TGG AGG CTG AAG               |                             |        |                           |                           |
|               |             | Zika2 R           | TGT GTG AGA CTT TGG CCA TTC               | NS1                         | 70     |                           |                           |
|               |             | Zika2 P           | AGG GCC CAC CTG ATT GAG ATG AAA ACA TGT   |                             |        |                           |                           |
|               |             | Zika III F        | TGG CAG TGC TGG TAG CTA TG                |                             |        |                           |                           |
|               |             | Zika III R        | GTG GCA CCC ATC AAA ATT GCA               | NS1/NS2a                    | 78     |                           |                           |
|               |             | Zika III P        | AGC TTA GCC AGG TCA CTC ATT GAA AAT CCT   |                             |        |                           |                           |
|               |             | Zika IV F         | CCA ACT GGG AGA ACC ACC T                 |                             |        |                           |                           |
|               |             | Zika IV R         | GGT CGT TCT CCT CAA TCC AC                | NS5                         | 102    |                           |                           |
|               |             | Zika IV P         | ACT CTA TTC CAC ACC ATG AGC ATG TCC TC    |                             |        |                           |                           |
| Zika          |             | Zika VI F         | GCA TCA GGT GCA TAG GAG TC                |                             |        | Cell culture strain MR766 |                           |
|               |             | Zika VI R         | TTG ATG CCT CAT AGC AGT AGG A             | prM/E                       | 194    |                           |                           |
|               |             | Zika VI P         | AGC AAT AGG GAC TTT GTG GAA GGT ATG TCA   |                             |        |                           |                           |
|               |             | Zika VII F        | GCA ATC AAG CCA TCA CTG GG                |                             |        |                           |                           |
|               |             | Zika VII R        | GTC TCT TCT TCT CCT TCC TAG               | C                           | 138    |                           |                           |
|               |             | Zika VII P        | CAT TGA TTA TTC TCA GCA TGG CAG CCA GAT C |                             |        |                           |                           |
|               |             | Zika VIII F       | AAG ATC CTA CTG CTA TGA GGC A             |                             |        |                           |                           |
|               |             | Zika VIII R       | GGA GCA TGC AAA CTT AGC GC                | E                           | 198    |                           |                           |
|               |             | Zika VIII P       | TCA ATA TCA GAC ATG GCT TCG GAC AGC C     |                             |        |                           |                           |
| Phenuiviridae | Phlebovirus | Rift Valley fever | RVFV F                                    | ACAAAAAGCGGGTGGGGATAG       | Nsm/Gn | 82                        | Cell culture strain ZH548 |
|               |             |                   | RVFV R                                    | GCAATCCCTGCCATGGTTTC        |        |                           |                           |
|               |             |                   | RVFV P                                    | CGGTGTGAGAGACGAAGAGACGCTAAG |        |                           |                           |

|                                  |                                                                  |                            |                                           |                                            |     |     |                         |
|----------------------------------|------------------------------------------------------------------|----------------------------|-------------------------------------------|--------------------------------------------|-----|-----|-------------------------|
| Peribunyaviridae Orthobunyavirus |                                                                  | RVF_SegS_F                 | GTT GAT TTG CAG AGT GGT CGT               |                                            |     |     |                         |
|                                  |                                                                  | RVF_SegS_R                 | GCG AAC CTC GTG ACT AGG A                 | NSs                                        | 134 |     |                         |
|                                  |                                                                  | RVF_SegS_P                 | CGA TGG TGC ATG AGA AAG ACA CAA CAG G     |                                            |     |     |                         |
|                                  | Batai                                                            |                            | batai_1_F                                 | GAA TGG GAG GTT ACG CTT AAC                |     |     |                         |
|                                  |                                                                  |                            | batai_1_R                                 | GTA CCT GGC AAG GAA TCC AC                 | N   | 134 |                         |
|                                  |                                                                  |                            | batai_1_P                                 | CTT GGG GGC TGG AAG GTT ACT GTA TTT AAT A  |     |     | NA                      |
|                                  |                                                                  |                            | batai_2_F                                 | GGG CAG ATG GTG AGG AGA T                  |     |     |                         |
|                                  |                                                                  |                            | batai_2_R                                 | TGC TAA CCG TCC ATG TCC CT                 | N   | 188 |                         |
|                                  |                                                                  |                            | batai_2_P                                 | TTA CCT CTC ATT CTT CCC AGG CTC GGA        |     |     |                         |
|                                  | Bunyamwera                                                       |                            | Bunyam_1_F                                | CGG TAC CTA CTT GAG AAG ATT C              |     |     |                         |
|                                  |                                                                  |                            | Bunyam_1_R                                | TAC ACC TCT TCT CCA TCT GAC                | N   | 121 |                         |
|                                  |                                                                  |                            | Bunyam_1_P                                | TGA AAG TGA GTG AAC CAG AAA AGC TGA TCA TC |     |     |                         |
|                                  |                                                                  |                            | Bunyam_2_F                                | TTG TTA CAG CCG GTG GTA GTA                |     |     |                         |
|                                  |                                                                  |                            | Bunyam_2_R                                | GAC TTA AAC CAG CCA GTG CTA A              | Gn  | 192 | NA                      |
|                                  |                                                                  |                            | Bunyam_2_P                                | TGG TGG TTC CTG TCA CTT CAA AAT GGT TCA    |     |     |                         |
|                                  |                                                                  |                            | Bunyam_3_F                                | ACA TCA CTC TTC GGT GCA GG                 |     |     |                         |
|                                  |                                                                  |                            | Bunyam_3_R                                | TGG ATC CTC TAG CAG CCC A                  | NSm | 200 |                         |
|                                  |                                                                  | Bunyam_3_P                 | TCT GAC CAT CAT TTT TGC AGG AGT AGC ATT G |                                            |     |     |                         |
|                                  | Bwamba                                                           |                            | Bwa_S_F                                   | TAT CCA GGG GCA CTC AAT ACA A              |     |     |                         |
|                                  |                                                                  |                            | Bwa_S_R                                   | TCC ACC TCC CAG TTT CCA AAT T              | N   | 124 | Cell culture strain BWA |
|                                  |                                                                  |                            | Bwa_S_P                                   | ATA CCG CTA GGA CAT TCT TCC TCA ATG CC     |     |     |                         |
|                                  | Cache Valley                                                     |                            | CacheV_S_F                                | GAT GGT CTT ACC CTC CAC AG                 |     |     |                         |
|                                  |                                                                  |                            | CacheV_S_R                                | TAA GAA CAT CTC TGA GCC AGG                | N   | 194 | NA                      |
|                                  |                                                                  |                            | CacheV_S_P                                | ACT CAG TGG ATA CCT TGC CAG GTA CCT A      |     |     |                         |
|                                  | California Encephalitis (Snowshare, Chatanga, La Crosse viruses) |                            | CalifEV_1_F                               | GCA TCA ACA GGT GCA AAT GGA T              |     |     |                         |
|                                  |                                                                  |                            | CalifEV_1_R                               | TCG CCA AAT TTA GGA CTT GCC                | N   | 172 |                         |
|                                  |                                                                  | CalifEV_1_P                | TTG ATC CTG ATG AAG GGT ATA TGG CAT TCT G |                                            |     | NA  |                         |
|                                  |                                                                  | CalifEV_2_F                | GGC AGA GGT ATG GTT CAC TAA               |                                            |     |     |                         |
|                                  |                                                                  | CalifEV_2_R                | GTC CTA AAC AAT TTG CCT GCC               | N                                          | 186 |     |                         |
|                                  |                                                                  | CalifEV_2_P                | CTG CTG AAA AGT GGA TGT CCC AAA AGA CC    |                                            |     |     |                         |
| C Groupe_Apeu                    |                                                                  | GpC_Ape_F                  | CCC AAA CTA CCA AGA GTG TAA C             |                                            |     |     |                         |
|                                  |                                                                  | GpC_Ape_R                  | GCA AGC ATA CGT CTT TGG GAT A             | G2                                         | 102 |     |                         |
|                                  |                                                                  | GpC_Ape_P                  | AGC ATA AGG TCT CGG TCG GGC TTG AAA       |                                            |     |     |                         |
| C Groupe_Restan                  |                                                                  | GpC_Rest_F                 | GTA AGA GCA GAG GAT CAG CAT T             |                                            |     |     |                         |
|                                  |                                                                  | GpC_Rest_R                 | TAT ACT CCT GAC ATT GCC CAG A             | G2                                         | 175 |     |                         |
|                                  |                                                                  | GpC_Rest_P                 | TTG CCT TGC AGT AAT TCT AGC CAC ATT ACT C |                                            |     |     |                         |
| C Groupe_Murutucu                |                                                                  | GpC_Muru_F                 | CTA GGA TTC TCT GCA AGA GTA G             |                                            |     | NA  |                         |
|                                  |                                                                  | GpC_Muru_R                 | TGT TGT ATG ACA GCT GCA TTG C             | G3                                         | 110 |     |                         |
|                                  |                                                                  | GpC_Muru_P                 | AGG TTC TGC ATT TTG CCT CGC TGT GAT ATT A |                                            |     |     |                         |
| C Groupe_Oriboca                 |                                                                  | GpC_Oribo_F                | CTA GAA CTG TAT GCT GAC ACA G             |                                            |     |     |                         |
|                                  |                                                                  | GpC_Oribo_R                | TCT CTC CCT TTT GAG CTC TGT A             | N                                          | 198 |     |                         |
|                                  |                                                                  | GpC_Oribo_P                | AAC ACC GCC CAG AGA TTG AAG AGA AAA TCA   |                                            |     |     |                         |
| C Groupe_Marituba and Apeu       | GpC_Mari_F                                                       | GTT CTT CCT CCG TGC GAA TG | NSs                                       | 140                                        |     |     |                         |

|                              |                                           |                                            |         |     |                           |
|------------------------------|-------------------------------------------|--------------------------------------------|---------|-----|---------------------------|
|                              | GpC_Mari_R                                | CCA TCA GCG ACC GTA TTT GC                 |         |     |                           |
|                              | GpC_Mari_P                                | AGG CTA AAC AGA AGC TCC GTA AGA GTT CG     |         |     |                           |
| C Groupe_Nepuyo              | GpC_Nepu_F                                | GAG TGC ATC TAC TTT TGA CCC TA             | NSs     | 147 |                           |
|                              | GpC_Nepu_R                                | AGC GAC CTT TGC CGT ACT C                  |         |     |                           |
|                              | GpC_Nepu_P                                | AA CAG GCG TAC CAG AGT TTT ATC GAT AAC C   |         |     |                           |
| C Groupe_Itaqui              | GpC_Itaq_F                                | AT TGG TCT GAG TGT AAC CCT G               | N / NSs | 194 |                           |
|                              | GpC_Itaq_R                                | CTG TTG TCG TAC CCA TAA CCT                |         |     |                           |
|                              | GpC_Itaq_P                                | TGG AGA CAG CCA ACG GCC CGA TC             |         |     |                           |
| C Groupe_Caraparu            | GpC_Cara_I_F                              | TTC TGC CGT CGT ACG AGT CT                 | N / NSs | 189 |                           |
|                              | GpC_Cara_I_R                              | GTA ACC TGA TAT GCG ATG CAA C              |         |     |                           |
|                              | GpC_Cara_I_P                              | TCT ACA TCA ACG CGG CGA AGG TCA AAG        |         |     |                           |
|                              | GpC_Cara_II_F                             | TGA GAG TGA CTA CGG TTC CC                 |         |     |                           |
|                              | GpC_Cara_II_R                             | CGT AGT CAG GCA GTG GAA TG                 |         |     |                           |
| GpC_Cara_II_P                | AAT TGG AGT CCG CTA TTG TTC GAG TCT TCT A |                                            |         |     |                           |
| Germiston                    | Germi_segS_F                              | GGG CCA GAA GTC TAC CTG T                  | N       | 196 | NA                        |
|                              | Germi_segS_R                              | TCC ACT TCT CCA AGC TTA GTT G              |         |     |                           |
|                              | Germi_segS_P                              | CCT TCT TCC CAG GTG CTG AAA TGT TCC T      |         |     |                           |
| Guama Group_Catu             | Guama_I_F                                 | TCA GAG AGG ATG AAG AAG CAC                | G2      | 105 |                           |
|                              | Guama_I_R                                 | ACA GGA TGA AAG AAG AGC CTC                |         |     |                           |
|                              | Guama_I_P                                 | AGA GAG TCT GGA ATG TGC CAC GGA TAT AAA T  |         |     |                           |
| Guama Group_Catu and Guama   | Guama_II_F                                | GTC GCA CAA GGG AGA AAT AAC                | N       | 154 |                           |
|                              | Guama_II_R                                | GCT GTA CCA AAC TTA AGA GTG G              |         |     |                           |
| Guama_II_P                   | TTC ATC CCT AGT GAG GCT TAC GCT GTC       |                                            |         |     |                           |
| Guama Group_Bimiti           | Guama_III_F                               | ACT TCA GAA TGC TCC CAT TGG                | N       | 173 | NA                        |
|                              | Guama_III_R                               | GGA GCT TAG ACA CTA GTG TCA                |         |     |                           |
|                              | Guama_III_P                               | CAA TTG GGA TTT ACA GAG TAC AGC AGA AAC AG |         |     |                           |
| Guama Group_Moju             | Guama_IV_F                                | AGT TCA GAA TGC TTC CCC TAG                | N       | 102 |                           |
|                              | Guama_IV_R                                | ATA TCG CCA TAC TGC TGT CTG A              |         |     |                           |
|                              | Guama_IV_P                                | CAA TAG GCA TTT ACA GAG TCC AGC AGA AAC A  |         |     |                           |
| Guama Group_Mahogany Hammock | Guama_V_F                                 | GGA TCA CCT GGG AAC ATG GT                 | N       | 196 |                           |
|                              | Guama_V_R                                 | CAG GAC CAT CCA TTG GCT TG                 |         |     |                           |
|                              | Guama_V_P                                 | CTG GCA TGT CTC CAT ACT GCT GGC G          |         |     |                           |
| Guaroa                       | Guaroa_S1_F                               | GTT TAA CCC GGA GCT CCA ATA                | N       | 217 |                           |
|                              | Guaroa_S1_R                               | AAT CAT CGA GGA CTG GAC TGT T              |         |     |                           |
|                              | Guaroa_S1_P                               | TGC TAC ATT TAA ACG TAC AAA CAC AAC AGG GC |         |     |                           |
|                              | Guaroa_S2_F                               | TAT AGC TGC ATC AAA CGG GAT C              |         |     |                           |
|                              | Guaroa_S2_R                               | GCC TCC ATC ATC TTT TTC TGG                |         |     |                           |
|                              | Guaroa_S2_P                               | ACA TGG GAA GAT GGA CCA GAG GTT TAT CT     |         |     |                           |
|                              | Guaroa_S3_F                               | GGA GAC TTT CAA ATT CTA CCC C              |         |     |                           |
|                              | Guaroa_S3_R                               | ATT AGC TTT CTT CCA GCC CAG                |         |     |                           |
| Guaroa_S3_P                  | TGA TGA GAC AAC AGA AAG AGC AGC ATT GAT C |                                            |         |     |                           |
| Ilesha                       | Ile_L_F                                   | GCA CAT GGC GAT TTT ACA CTG A              | RdRp    | 108 | Cell culture strain ILEP1 |
|                              | Ile_L_R                                   | TCT TGG TGG CAT AGA ACT GAT G              |         |     |                           |

|                  |              |                                           |        |     |    |
|------------------|--------------|-------------------------------------------|--------|-----|----|
|                  | Ile L P      | CTG CAC CAT GGT GCA CAA CAG AGA CT        |        |     |    |
| Inkoo            | Inkoo S F    | TTG ACG TAG ACC TAC TGA TGG               | RdRp   | 149 | NA |
|                  | Inkoo S R    | GTG GGA TCT CTA ATG TCA ATG G             |        |     |    |
|                  | Inkoo S P    | CAA GAC ATG ACT ACT TCG GGA GAG AGT TG    |        |     |    |
| Jamestown Canyon | Jamestown F  | AAG CCA AAG CTG CTC TCG CT                | N      | 166 | NA |
|                  | Jamestown R  | AAC CCA TCT GGC TAG ATA TCC               |        |     |    |
|                  | Jamestown P  | CGT AAA CCG GAG CGG AAA GCT ACT C         |        |     |    |
| Keystone         | Key_segS F   | AGG GTA TGT GGC ATT TAT GGC               | N      | 120 | NA |
|                  | Key_segS R   | CCA CTC TCC AAA CTT AGG TGT A             |        |     |    |
|                  | Key_segS P   | TAA CCA TGG GGA GTC GAT CAG TCT GTC       |        |     |    |
| La Crosse        | LaCrosse 1 F | GCT GCA AGC CCA GTG TAT CA                | Gn     | 196 | NA |
|                  | LaCrosse 1 R | TGC CAA TCA GAG ACT AGC CAT               |        |     |    |
|                  | LaCrosse 1 P | AAG GTG TTT CCA AGA TGG GGC TAT AGT GAA G |        |     |    |
|                  | LaCrosse 2 F | TTC CAA GAT GGG GCT ATA GTG               | Gn     | 175 |    |
|                  | LaCrosse 2 R | AGT CGT GCC AAT CAG AGA CC                |        |     |    |
|                  | LaCrosse 2 P | AAG CAA AAC CCA TCC AAA GAG GCA GTC AC    |        |     |    |
|                  | LaCrosse 3 F | AAT CAG AGG TGC CTG CAT TAG               | Gc     | 185 |    |
|                  | LaCrosse 3 R | GGC CAG TAC ACA ATT CAT CAT G             |        |     |    |
|                  | LaCrosse 3 P | CTG GGA CAT CTA TCG GGT TCA AAA TCA ATT C |        |     |    |
|                  | LaCrosse 4 F | CCA TTC ACA GAG TGT GGC AC                | Gn     | 134 |    |
|                  | LaCrosse 4 R | CGA CTT GCA CAT GAC TCT GG                |        |     |    |
|                  | LaCrosse 4 P | ACA TTG TGT CTG TGG TGC TCG CTA TGA TAC   |        |     |    |
|                  | LaCrosse 5 F | TGT CTG TGG TGC TCG CTA TG                | Gn/Nsm | 104 |    |
|                  | LaCrosse 5 R | TTG CAC ATG ACT CTG GCA GC                |        |     |    |
|                  | LaCrosse 5 P | ATA CTT CCG ATA GAA TGA AAC TGC ACA GAG C |        |     |    |
|                  | LaCrosse 6 F | GCC CAG TGT ATC AAA GGT GTT T             | Gn     | 97  |    |
|                  | LaCrosse 6 R | GCT AAC ATC ATC TTT CAG GCA C             |        |     |    |
|                  | LaCrosse 6 P | CCA AGA TGG GGC TAT AGT GAA GCA AAA CC    |        |     |    |
|                  | LaCrosse 7 F | CTC ACA TTT GCA AGA GAG AGG               | Gc     | 123 |    |
|                  | LaCrosse 7 R | CAC TTC TTC GGT CTC CTT CC                |        |     |    |
|                  | LaCrosse 7 P | ACA AGT TCA TGG GGA TGC GAA GAG TTT GG    |        |     |    |
|                  | LaCrosse 8 F | ATC CAA AGA GGC AGT CAC GG                | Gn     | 199 |    |
|                  | LaCrosse 8 R | GAT CAT CAC CAA CCT CTA TCA C             |        |     |    |
|                  | LaCrosse 8 P | AGG TGT GCC TAA AGG ATG ATG TCA GTA TGA T |        |     |    |
| Ngari            | Ngari_segS F | TTC ATG ATG TCG CTG CTA ACA C             | N      | 79  | NA |
|                  | Ngari_segS R | CCC AAG GTT AAG TGT AAC TTC C             |        |     |    |
|                  | Ngari_segS P | CAG CAG TAC TTT TGA CCC AGA GGT CG        |        |     |    |
| Nyando           | Nyando 1 F   | CGC TCG GAT CTT CTT CCTCA                 | N      | 154 | NA |
|                  | Nyando 1 R   | TGT AAG ATC CGT GTC GCT GAT A             |        |     |    |
|                  | Nyando 1 P   | ATG CCC GGA AAG CCA AAG ATC AAC TCT CT    |        |     |    |
|                  | Nyando 2 F   | CAG AGC CGA AGG TTG GTC TT                | N      | 182 |    |
|                  | Nyando 2 R   | TGC CAG CTT GTG CAA CAC TAT T             |        |     |    |
|                  | Nyando 3 P   | AAA TTT GGA ACA TGG CAG GTG GAA GTG GTC   |        |     |    |

|               |               |               |                                                    |                                                                                                           |                            |      |                                |                             |
|---------------|---------------|---------------|----------------------------------------------------|-----------------------------------------------------------------------------------------------------------|----------------------------|------|--------------------------------|-----------------------------|
|               |               | Oropouche     | Oropou F<br>Oropou R<br>Oropou P                   | GTG GTA ACC TCT TCA AGG AGA<br>TAG CAC TGG ATT GCA CTC AGA<br>TGA ACT TGA GTG TAG GAC TTG GCG AAA TAT G   | Gn                         | 181  | NA                             |                             |
|               |               | Snowshoe hare | Snow_segS F<br>Snow_segS R<br>Snow_segS P          | GAC GAT CTT ACC ATC CAC AGA<br>CCG CTA TCC CAT CTC ACT C<br>TTG TCA GGA TAT TTA GCC AGA TGG GTT CTT G     | N                          | 151  | NA                             |                             |
|               |               | Tacaiuma      | Tacaiuma F<br>Tacaiuma R<br>Tacaiuma P             | CCA TTA GCT GAG GTT GCT GG<br>TCC TTT TTC ACC CTA GCT ATG C<br>TGT CTC ATG GGC TAA TTC TAC GCC AGA AAT    | N                          | 139  | NA                             |                             |
|               |               | Tahyna        | Tahy_S F<br>Tahy_S R<br>Tahy_S P                   | ATT TGG CTA GAT GGG TGC TAG<br>GTC CCA CCT GAT CCC ATT AG<br>ACT CAG CTA TGG GGT TGA TAA CGG TTG TT       | N                          | 156  | Cell culture strain 92         |                             |
|               |               | Trivattatus   | Trivatta F<br>Trivatta R<br>Trivatta P             | CCA TCA ACA GGT GCA AAC GG<br>TGA TTA TTG ACC ACC TCC ACC<br>ATT TGA TCC CGA TGC AGG GTA TGT GGC          | N                          | 199  | NA                             |                             |
| Reoviridae    | Orbivirus     | Orungo        | Orungo_1 F<br>Orungo_1 R<br>Orungo_1 P             | GTG ATT CGG GCA AAC TGC GT<br>GAA CTC GCA TAA TTG CGC AGA A<br>TTT AAA GGT ATG CAA GTT GTG GTA GAG TCG AC | RdRp                       | 171  | NA                             |                             |
|               |               |               | BannaV F<br>BannaV R<br>BannaV P                   | ATCCGGTGTCTGTCCTTGG<br>TCAAAGCCCCACACACTCAGTG<br>ACCGTGACTACCATGCCACTACCAAATG                             | VP7                        | 110  | Cell culture strain BAV        |                             |
|               |               |               | Jurona F<br>Jurona R<br>Jurona P                   | AGT TGA TGA TTA CAG AGG ACC C<br>TTC TGC CTG ATT GCT TCT AAG C<br>ATA CCG GAT GGC AAG TCA AGC AGT GG      | N                          | 189  | NA                             |                             |
| Rhabdoviridae | Vesiculovirus | Jurona        | Barmah F<br>Barmah R<br>Barmah P                   | GTG CCC AGG TCC GAA GTT A<br>TCT GTA TGT CAC TTG CGG TTC A<br>CGG AGG TGA AAG GAA AGA TCC ATG TGC         | E2                         | 110  | NA                             |                             |
|               |               |               | chik F SG<br>chik R SG<br>chik-P2                  | TGG AAT GGC TGG TTA ACA AGA TAA<br>CTC CGC GGA CAC CTA ACG<br>ACG GCC ACC ACG TGC TCC TGG T               | NSP2                       | 114  |                                |                             |
|               |               |               | Chik_WAfri F<br>Chik_WAfri R<br>Chik_WAfri P       | CGA ACT ACA TAT CCG GCA CC<br>TGA TTT GGT ACG ACG CAA CTG T<br>AGT GTA CTC ACC CCC AAT CAA TAT CCG AC     | NSP4                       | 129  |                                |                             |
| Togaviridae   | Alphavirus    | Chikungunya   | Chik Asia F<br>Chik Asia R<br>Chik Asia P          | TGA TCA AAT GAC CGG CAT CCT<br>CGT TGC GTT CTG CCG TTA AC<br>TGC TAC AGA AGT CAC GCC GGA GGA TG           | NSP1                       | 104  | Cell culture strain LR2006_OPY |                             |
|               |               |               | Chik_IndECSA F<br>Chik_IndECSA R<br>Chik_IndECSA P | AGG AAG TCC ACG AGG AGA AG<br>TTA GTC TCT GGA TGA TTG CTG C<br>TGT TAC CCA CCT AAG CTG GAT GAA GCA AAG    | NSP3/NSP4                  | 158  |                                |                             |
|               |               |               | Chik_ECSA F<br>Chik_ECSA R<br>Chik_ECSA P          | ACA CAA CCC CGT TCA TGT ACA<br>CTA CTG AGA ACA GCA CAC GG<br>ATG CCA TGG CGG GTG CCT ACC C                | NSP1                       | 191  |                                |                             |
|               |               |               | Eastern Equine Encephalitis                        | EEEV F                                                                                                    | GAA GTG GCC TGG AGC TTT TG | NSP3 | 83                             | Cell culture strain H178/99 |



|                |               |                                        |      |     |                               |
|----------------|---------------|----------------------------------------|------|-----|-------------------------------|
|                | EEEE R        | GCA TGG ATG ACG TTC GGA GA             |      |     |                               |
|                | EEEE P        | ATG CTT GAC GAG GTG CGC TTT ACC AGT    |      |     |                               |
|                | EEEE 1 F      | TGT ATT GCC TCT AAG GCC GC             |      |     |                               |
|                | EEEE 1 R      | GTT CGT ACA CCT TTC AGC GC             | NSP1 | 184 |                               |
|                | EEEE 1 P      | CTG GTA GTA AAT GGA AGT CGG TGC ATG CA |      |     |                               |
|                | EEEE 2 F      | GTT CAT GTT GAC TTA GAC GCA G          |      |     |                               |
|                | EEEE 2 R      | ACC TGG TCT GTA TCC ACT TCT            | NSP1 | 149 |                               |
|                | EEEE 2 P      | ACA GCC CAT TCG TCA AGT CAC TGC AAA G  |      |     |                               |
| Mayaro         | Maya 1 F      | ATG AGC GAA GCC TAC GTG G              |      |     |                               |
|                | Maya 1 R      | ATC GTT ACG GCA TGG TCA CC             | E1   | 162 |                               |
|                | Maya 1 P      | AGC GCG CTG ACG TGT GTA AAC ACG A      |      |     | Cell culture strain TC625     |
|                | Maya 2 F      | CAG CCG GCA ATA TCC ACG T              |      |     |                               |
|                | Maya 2 R      | GTC TAG TGA ATG CGC TGT CG             | E1   | 194 |                               |
|                | Maya 2 P      | CCC CTA TAC CCA GAC ACC ATC TGG TT     |      |     |                               |
| O'Nyong-Nyong  | ONN-9237F     | ACA AGT GCA AAT GTG ACG GC             |      |     |                               |
|                | ONN-9362R     | GCG GTG AAT TGT ATT GCC ATT T          | E2   | 125 | Cell culture strain Dakar 234 |
|                | ONN-9307P     | GTT TGT AAC CGC TGT GTG GCA TTG GTC T  |      |     |                               |
| Ross River     | RRV - 9,239 F | CAA TGC CAT GCT GCC GTT AC             |      |     |                               |
|                | RRV - 9,328 R | TTT GCC CCT CCT AGC TGT C              | E2   | 72  | Cell culture strain 5281v     |
|                | RRV - 9307 P  | ATC AGC CCT GGG AAC AAA TGG AGA GGT    |      |     |                               |
| Semliki forest | SemFV-9240F   | CGT CAT CCA CGG CAA AAG AG             |      |     |                               |
|                | SemFV-9310R   | TGC GGT AGG AAA AGA GCG T              | E2   | 72  |                               |
|                | SemFV-9261P   | TGACACTGCACCTTCACCCAGATCATC            |      |     | Cell culture strain 1745      |
|                | Seml II F     | AAC AGC TGA AGA CAA GCA GGA            |      |     |                               |
|                | Seml II R     | AAC GCC TTA ATG TCC CTC GC             | NSP4 | 179 |                               |
|                | Seml II P     | CGA AGA CAG GCG ACG AGC ACT GAG        |      |     |                               |
| Sindbis        | SinFP         | GGT TCC TAC CAC AGC GAC G              |      |     |                               |
|                | SinRP         | TGA TAC TGG TGC TCG GAA AAC            | NSP1 | 75  |                               |
|                | SinP          | TTG GAC ATA GGC AGC GCA CCG GCT        |      |     |                               |
|                | Sindbis I F   | GAA GGT AGA CGC CTA CGA AC             |      |     |                               |
|                | Sindbis I R   | ATG TAC TCT TGG TTG GTG GAA G          | E1   | 152 |                               |
|                | Sindbis I P   | ATG CGA CCA CTG TTC CAA ATG TGC CAC    |      |     |                               |
|                | Sindbis 2 3 F | GGT AGA CGC CTT CGA ACA TG             |      |     |                               |
|                | Sindbis 2 3 R | GTG ACG TAC TCC AGG TTC GT             | 6k   | 152 |                               |
|                | Sindbis 2 3 P | CGA CCA CTG TCC CAA ATG TGC CGA G      |      |     | Cell culture strain Egypt 339 |
|                | Sindbis IV F  | AAT TCG AGG TAG TAG CAC AGC            |      |     |                               |
|                | Sindbis IV R  | GCA GAC GCA GTG ATA GTG GT             | NSP1 | 176 |                               |
|                | Sindbis IV P  | AGG CCA CAC CAA ATG ACC ATG CTA ATG C  |      |     |                               |
|                | Sindbis V F   | GTA GGA ATT AGG AAC ACT CTC G          |      |     |                               |
|                | Sindbis V R   | CTG ACT ATT TAG GAC CGC CG             | NSP4 | 162 |                               |
|                | Sindbis V P   | CAG TTG CCG TAT CGA CCA GGT ACG A      |      |     |                               |
|                | Sindbis VI F  | TAA CAG TGA AGA CGT GGT CAC            |      |     |                               |
|                | Sindbis VI R  | CTC CGT CTC TTG TTC CTT CAT A          | NSP2 | 198 |                               |

|                                |                                        |                                        |       |     |                                  |
|--------------------------------|----------------------------------------|----------------------------------------|-------|-----|----------------------------------|
|                                | Sindbis VI P                           | CGC TCT GGC CAG AAA GTT CGT CCG        |       |     |                                  |
| Una                            | Una 1 F                                | ACG TGC ACA GCA TCG TGC A              |       |     |                                  |
|                                | Una 1 R                                | TAG TGC AAC TGC TGT CAG CG             | E1    | 155 |                                  |
|                                | Una 1 P                                | CGC CAC CAA AGG ACC ACA TCG TAC C      |       |     |                                  |
|                                | Una 2 F                                | CCG CAG TAA GTG CCT TAC AC             |       |     |                                  |
|                                | Una 2 R                                | TGA TTA ATA GCA CTG CGA CCG            | E1    | 187 |                                  |
|                                | Una 2 P                                | CAT ATG CAC TCA CAC CAG GCG CAG T      |       |     |                                  |
|                                | Una 3 F                                | CGT ATG CTC TCA CAC CAG G              |       |     |                                  |
|                                | Una 3 R                                | ACG GAG GCA GTA CGA AAT GAT            | E1    | 184 |                                  |
|                                | Una 3 P                                | TGC GGT GAT TCC CAT GAC AGT TGG ACT    |       |     |                                  |
|                                | Una 4 F                                | CAC GAT CAT GCG GCT GCTT               |       |     |                                  |
|                                | Una 4 R                                | ATG AAT CGG GTC CCT GCG A              | E1    | 139 |                                  |
|                                | Una 4 P                                | ATA AGG CAC ATA CCG CTT CAA TGA AGG CC |       |     |                                  |
| Venezuelan Equine Encephalitis | VEEV -5306 F                           | CATCCTTGACACCCTGGAGG                   |       |     |                                  |
|                                | VEEV -5394 R                           | GAAACTCCATGCTCCTTGCG                   | NSP3  | 89  |                                  |
|                                | VEEV - 5345 P                          | AAGTAAGAGTTAGTCTCGGCTGACGCTG           |       |     |                                  |
|                                | VEEV 1 F                               | GCT ACG ACC GCA AAC CAA C              |       |     |                                  |
|                                | VEEV 1 R                               | CAG CTT CCT ACA GCA CAC CT             | E3/E2 | 192 |                                  |
|                                | VEEV 1 P                               | TGA AAC CTT GGC TAT GCT CAG CGC CA     |       |     |                                  |
|                                | VEEV 2 F                               | GTT ATG ACG AGT TGC TCG AAG            |       |     |                                  |
|                                | VEEV 2 R                               | CAT GCC CTT CGC TCC TTA C              | E3/E2 | 176 |                                  |
|                                | VEEV 2 P                               | CAG TAC TGA AAT GTC CAG GCA GAG GCA A  |       |     |                                  |
|                                | VEEV 3 F                               | GCT GCC ATA GTC CAA TAG CAA            |       |     |                                  |
|                                | VEEV 3 R                               | CGA GAT GTG TGG AGT GAC AC             | E2    | 186 |                                  |
|                                | VEEV 3 P                               | T TGA GGC AGT GAA GAG CGA CGG GC       |       |     |                                  |
|                                | VEEV 4 F                               | ACG GAG TAG AGC AAG CGT G              |       |     |                                  |
|                                | VEEV 4 R                               | ACA CTC GCA TTC CAC CAG G              | E2    | 172 |                                  |
|                                | VEEV 4 P                               | CCA AGT CTA CGC ACA TGA TGC ACA GAA C  |       |     | Cell culture strain TC83 vaccine |
|                                | VEEV 5 F                               | TTT GCT ATG ATC GGA AAC CAG C          |       |     |                                  |
|                                | VEEV 5 R                               | AAC TCC CAA CGG CAC ACC T              | C/E3  | 164 |                                  |
|                                | VEEV 5 P                               | AGA GAC GCT GGC CAT GCT CAG TGC        |       |     |                                  |
|                                | VEEV 6 F                               | CCC TTA CAT GGC CAG ATG CA             |       |     |                                  |
|                                | VEEV 6 R                               | GTA GCG GTA TCT CTT CAA TGG T          | E3/E2 | 199 |                                  |
|                                | VEEV 6 P                               | TCA GAT GTG CCG TTG GGA GCT GCC        |       |     |                                  |
|                                | VEEV 7 F                               | AAA CTT ACA CGT CCG TAC ATG G          |       |     |                                  |
|                                | VEEV 7 R                               | CCT CAT AAC TCT GCT CTT AAC G          | E3    | 173 |                                  |
|                                | VEEV 7 P                               | CCA AGT GTG TGC GGT GTG CCG TTG        |       |     |                                  |
|                                | VEEV 8 F                               | TTG AAG CCG TAT TGA AGT GTC C          |       |     |                                  |
|                                | VEEV 8 R                               | TCG GAC GCA CTT TGC CAT GT             | E3/E2 | 100 |                                  |
|                                | VEEV 8 P                               | AGG TAG GCA GAA GAG ATC CAC GGA AG     |       |     |                                  |
| VEEV 9 F                       | GGA CTC ATC CGG AAA CTT GAA            |                                        |       |     |                                  |
| VEEV 9 R                       | GCA ACG AGC TAG GAG GAA GT             | E3/E2                                  | 147   |     |                                  |
| VEEV 9 P                       | AGG AAG AAC AAT GAG GTA CGA CGT GCA AG |                                        |       |     |                                  |

|                             |                |                                            |             |     |                          |
|-----------------------------|----------------|--------------------------------------------|-------------|-----|--------------------------|
|                             | VEEV 10 F      | GCT GTT AGA TGG AGT ACT GAG A              |             |     |                          |
|                             | VEEV 10 R      | AAG CGC ACG TAC CCA TCA TG                 | E3/E2       | 182 |                          |
|                             | VEEV 10 P      | TGT CAA GGG AGG TCC AAG AGG TCC C          |             |     |                          |
|                             | VEEV 11 F      | ATA TAA GCT TAC CAC GCC GTA C              |             |     |                          |
|                             | VEEV 11 R      | ATT GCC TGA TGA ATC TAG TCC G              | E2          | 169 |                          |
|                             | VEEV 11 P      | ATG GCC AGG TGC TCC AGA TGT GCA G          |             |     |                          |
|                             | VEEV 12 F      | GAT CCA CTG ATG AGC TGT TCA                |             |     |                          |
|                             | VEEV 12 R      | TGA CGC TTC CCG ATG GAT C                  | E3/E2       | 185 |                          |
|                             | VEEV 12 P      | AAG AGT ACA AGC TCA CAC GGC CAT ATA TG     |             |     |                          |
|                             | VEEV 13 F      | GGG ACT CAT TGA CCA TGG AG                 |             |     |                          |
|                             | VEEV 13 R      | AGG GAG GTG CAT TTC GAC GT                 | E2          | 190 |                          |
|                             | VEEV 13 P      | TTC AAG AAA GAT ACA GTA ACG CAC TCA TGC TC |             |     |                          |
|                             | WEEV- 4,164 F  | GGACGGCTAGACTTGTGAAG                       |             |     |                          |
|                             | WEEV - 4,278 R | ATGCTCATGTAGGCAGCTGC                       | NSP3        | 115 |                          |
|                             | WEEV - 4,184 P | CACGAACCGCTCATCATACATGCTGTA                |             |     |                          |
| Western Equine Encephalitis | WEEV B2 B3 F   | GGA GCG TAT ATT TTC TCA TCG G              |             |     |                          |
|                             | WEEV B2 B3 R   | GGC GTA ATA CTT CTC ATG GAC                | NSP3        | 111 | Cell culture strain 47a  |
|                             | WEEV B2 B3 P   | AAA CAG GCC AAG GTC ACC TTC AAC AGA AAT    |             |     |                          |
|                             | WEEV B1 A F    | TGT TCA AGA CTT TCA GGC ACT G              |             |     |                          |
|                             | WEEV B1 A R    | TTC TGA GTC TGT GTC CTG AGT                | NSP2        | 159 |                          |
|                             | WEEV B1 A P    | AGT GAG AGC GCC ACG ATC GTT TTC AAC        |             |     |                          |
| Beta-actine                 | beta-actine F  | GCT ACG TCG CCC TGG ACT T                  |             |     |                          |
|                             | beta-actine R  | AGG AAC GAC GGC TGG AAG A                  | beta-actine | 151 | Mosquitoes               |
|                             | beta-actine P  | AGG AAA TGG CCA CCG CTG CCT CGT            |             |     |                          |
| Escherichia coli            | eae F2         | CATTGATCAGGATTTTTCTGGTGATA                 |             |     |                          |
|                             | eae R          | CTCATGCGGAAATAGCCGTTA                      | eae         | 102 | Culture of EDL933 strain |
|                             | eae P          | ATAGTCTCGCCAGTATTCGCCACCAATACC             |             |     |                          |

NA: not available.

**Table S2.** Primers used for full genome sequencing of Zika virus.

| Name                | Sequence (5'-3')        | Sense<br>Antisense | Primer<br>concentrations |
|---------------------|-------------------------|--------------------|--------------------------|
| ZIKV- 1Sbis3        | AGTTGTTGATCTGTGTGAGTCAG | Sense 1            | 10 µM                    |
| ZIKV-epidemic-947R  | AATCAGCAGTATCATGACCAAGT | Antisense 1        | 10 µM                    |
| ZIKV-epidemic-889S  | TTAGCAGCAGCTGCCATCGC    | Sense 2            | 10 µM                    |
| ZIKV-epidemic-1893R | GGTACACARGGAGTATGACACG  | Antisense 2        | 20 µM                    |
| ZIKV-epidemic-1795S | GCTGGAGCTCTGGAGGCTG     | Sense 3            | 10 µM                    |

|                             |                          |              |            |
|-----------------------------|--------------------------|--------------|------------|
| ZIKV-epidemic-2753R         | ATCCACAACGACCGTCAGTT     | Antisense 3  | 10 $\mu$ M |
| ZIKV-epidemic-2718S         | GGAGCTCAACGCAATCCTGGA    | Sense 4      | 10 $\mu$ M |
| ZIKV- 3844Rbis              | TGTCCAATTAGCTCTGAAGATG   | Antisense 4  | 10 $\mu$ M |
| ZIKA 3581S cam              | AGTGCTTGTGATTCTGCTCATGGT | Sense 5      | 10 $\mu$ M |
| ZIKV-epidemic-4581R         | GTACCACGCTCCAGCTGCA      | Antisense 5  | 10 $\mu$ M |
| ZIKV-epidemic-4535S         | TGGTCCTGATGACCATCTGTG    | Sense 6      | 10 $\mu$ M |
| ZIKV-epidemic-5610R         | GGTGTCCATAATTGGTGAGTTG   | Antisense 6  | 10 $\mu$ M |
| ZIKV-epidemic-5432S         | TACTACAGCCAATYAGAGTCC    | Sense 7      | 20 $\mu$ M |
| ZIKV-epidemic-6545R         | CGAGGTTGTCAATGGCTTCCT    | Antisense 7  | 10 $\mu$ M |
| ZIKV-epidemic-6404S         | CGAGGTGGATGGAYGCCAGAG    | Sense 8      | 20 $\mu$ M |
| ZIKA 7511R cam              | CACAAAGTGGAAGTTGCSGCTGT  | Antisense 8  | 20 $\mu$ M |
| GP-ZIKV-Cuba-09/2018_6760S  | GAGCCAGCCAGAATTGCATG     | Sense 8      | 10 $\mu$ M |
| GP-ZIKV-Cuba-09/2018_7893R  | CTGCCACATCCAAGATCAATG    | Antisense 8  | 10 $\mu$ M |
| GP-ZIKV-Cuba-09/2018_7768S  | CTCAAGGACGGTGTGGCAAC     | Sense 9      | 10 $\mu$ M |
| GP-ZIKV-Cuba-09/2018_8871R  | ATGCTGCATTGCTACGAACC     | Antisense 9  | 10 $\mu$ M |
| GP-ZIKV-Cuba-09/2018_8771S  | CACTCGTCAGGTTATGAGCATG   | Sense 10     | 10 $\mu$ M |
| GP-ZIKV-Cuba-09/2018_10019R | CAGTTGGAACCCAGTCAACTG    | Antisense 10 | 10 $\mu$ M |
| ZIKV-7328S                  | ACGGCAGCTGGCATCATGAAG    | Sense 9      | 10 $\mu$ M |
| ZIKV-epidemic-8243R         | TGCTGGTGTATGGGCACAACA    | Antisense 9  | 10 $\mu$ M |
| ZIKV-epidemic-8166S         | AGAAGCACGGACGCTCAGAG     | Sense 10     | 10 $\mu$ M |
| ZIKV-epidemic-9171R         | CATCCAGTGATCCTCGTTCAAG   | Antisense 10 | 10 $\mu$ M |
| ZIKV-epidemic-8963S         | CAGTGGAAGCTGTGAACGATC    | Antisense 11 | 10 $\mu$ M |
| ZIKV-epidemic-10338R        | GTGGATAGGTARTCCATGTAC    | Antisense 11 | 20 $\mu$ M |
| ZIKV-epidemic-10248S        | TCTCATAGGGCACAGACCGC     | Sense 12     | 10 $\mu$ M |

ZIKV-epidemic-10670R

TCCCTCTTCTGGAGATCCAC

Antisense 12

10  $\mu$ M
